# Supplementary figures and images for: Pure spin currents induced by asymmetric H-passivation in B3C2P3 nanoribbons
Source: Royal Society of Chemistry journal article supplement (doi:10.1039/d4cp03033h), 2024-12-10

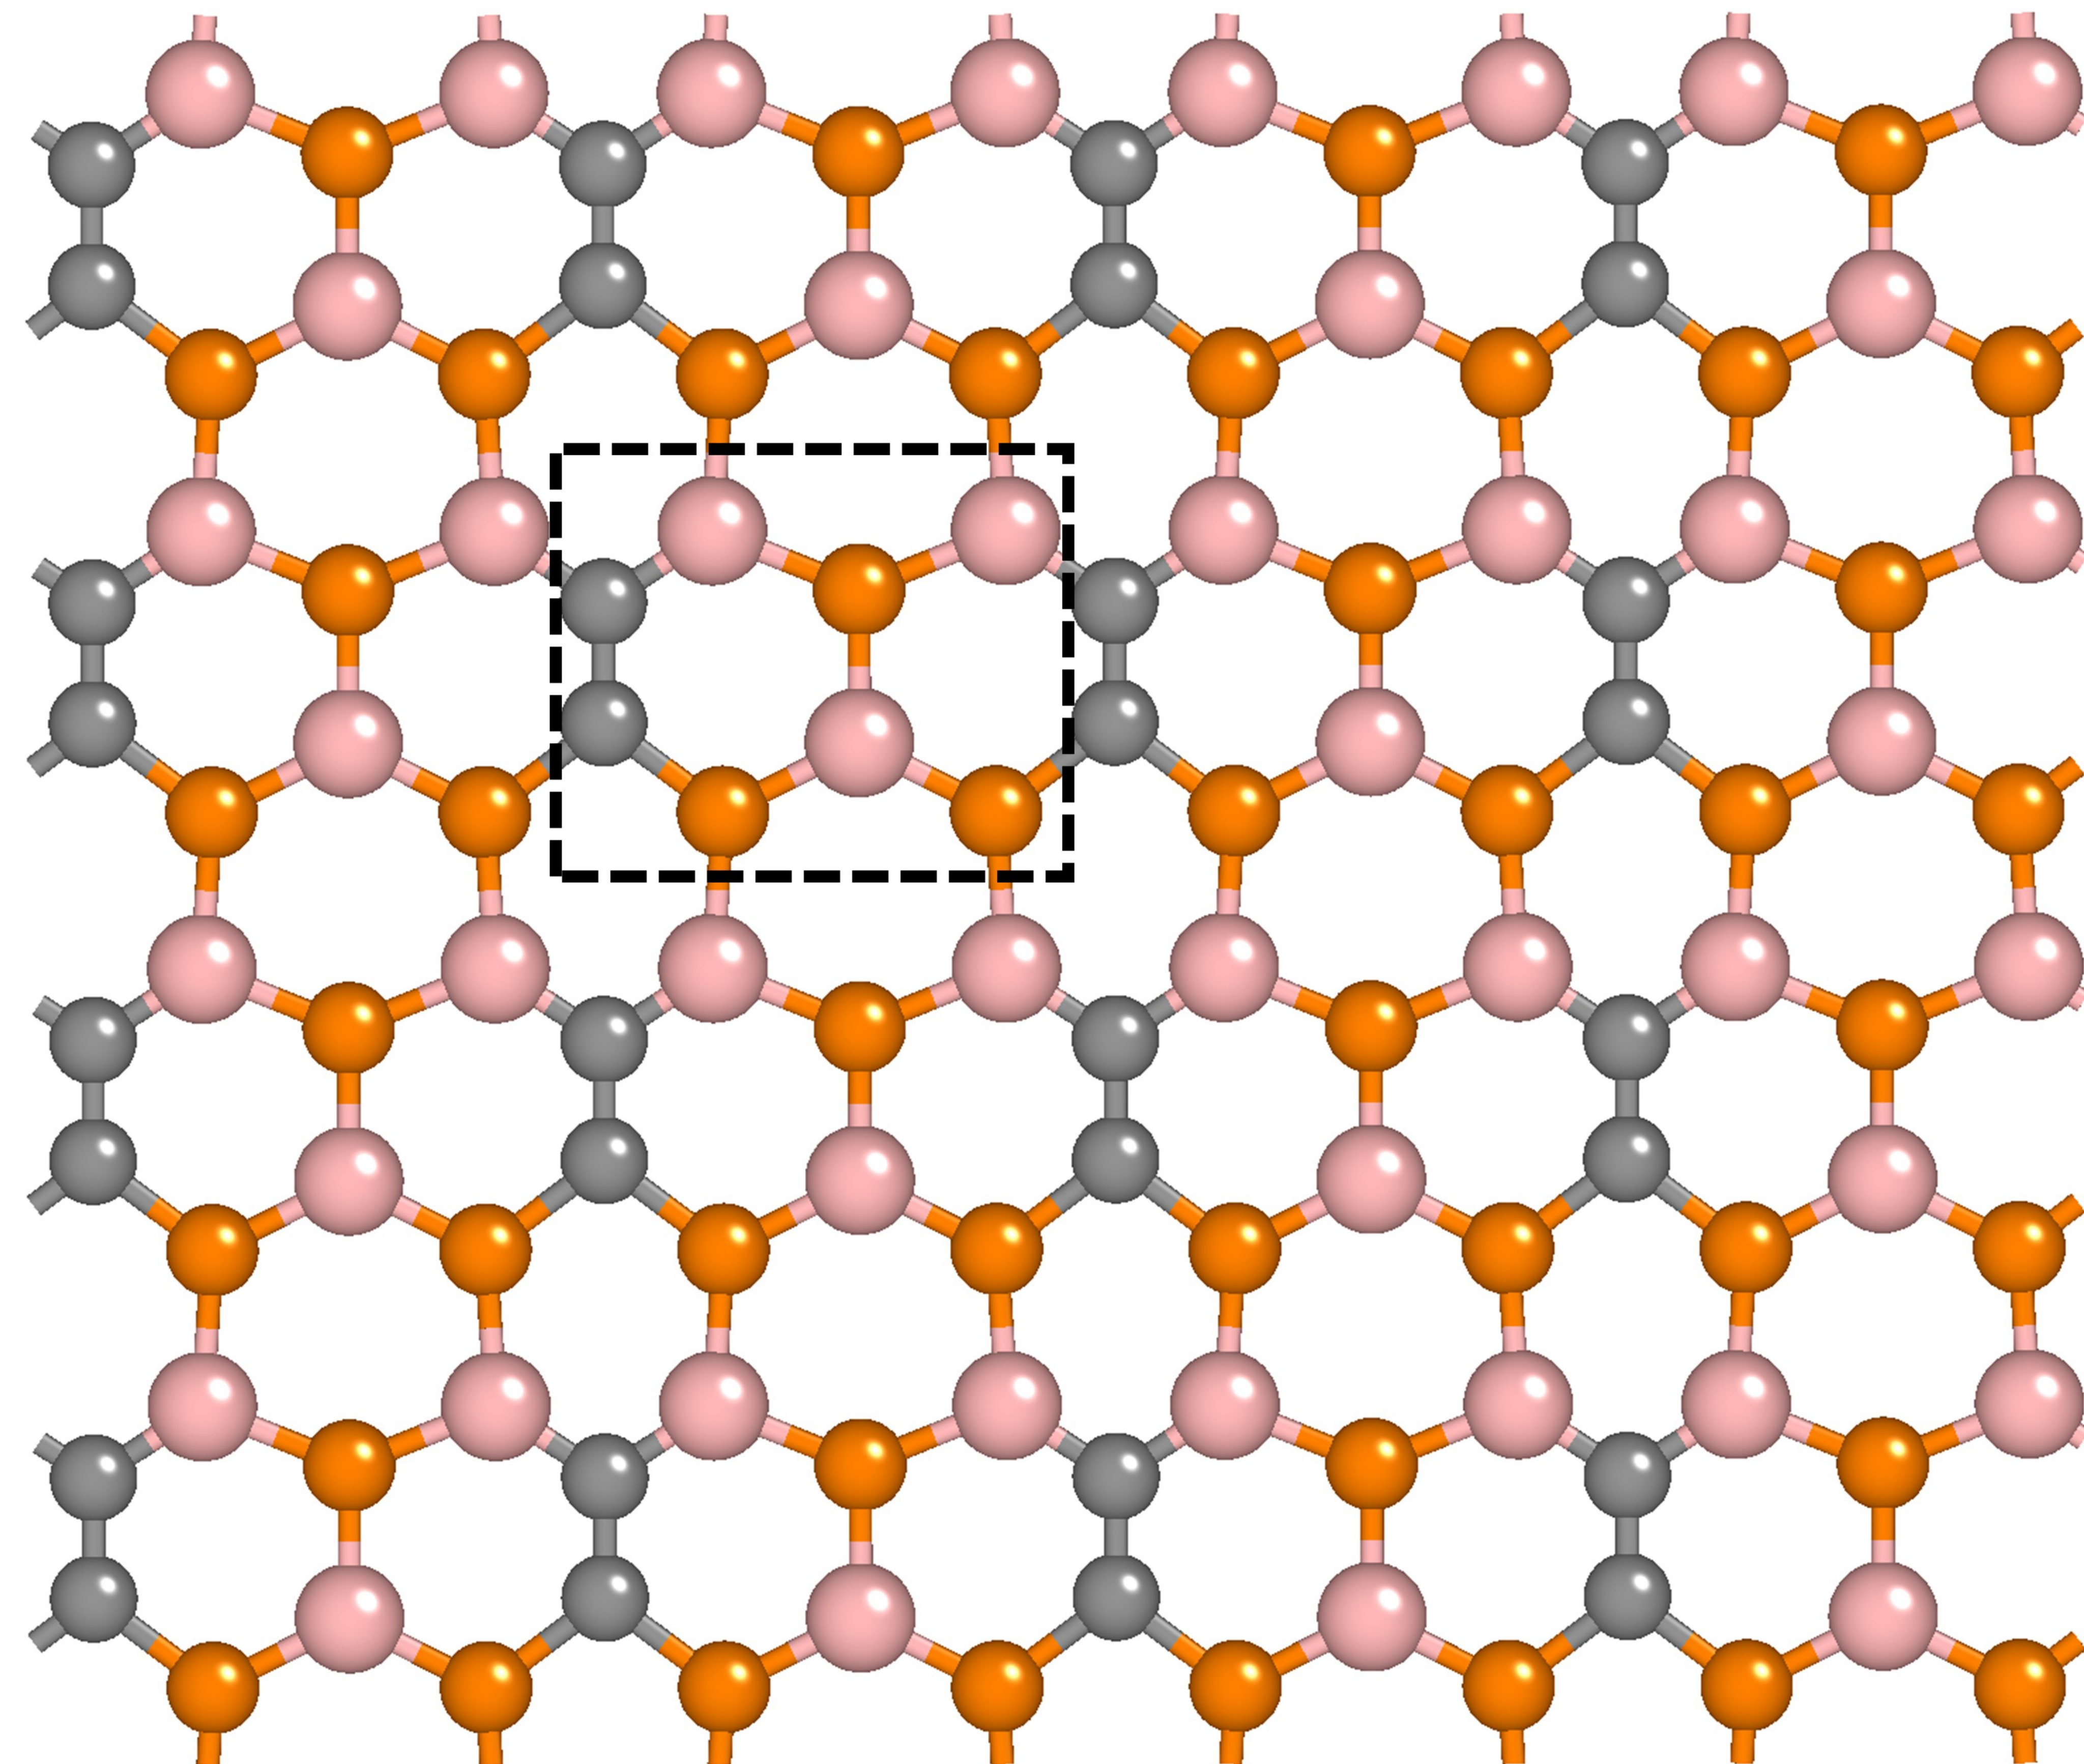

Supplement: d4cp03033h1.pdf [file d4cp03033h1.pdf]
